# Supplementary material for: Determination of stable isotope ratios using nuclear reaction analysis coupled with a particle–gamma coincidence method
Source: Royal Society of Chemistry journal article supplement (doi:10.1039/d0ja00283f), 2020-11-09
Supplement: d0ja00283f1.pdf [file d0ja00283f1.pdf]

## Supporting Information for:

# Determination of stable isotope ratios using Nuclear Reaction Analysis coupled with a particle-gamma coincidence method

Paula Rangel Pestana Allegro<sup>1,\*</sup>, Márcia de Almeida Rizzutto<sup>1</sup>, Nemitala Added<sup>1</sup>, Vitor Ângelo Paulino de Aguiar<sup>1</sup>, Dennis Lozano Toufen<sup>2</sup>, Eduardo Luiz Augusto Macchione<sup>1</sup>, Nilberto Heder Medina<sup>1</sup>, Roberto Vicençotto Ribas<sup>1</sup>, José Roberto Brandão de Oliveira<sup>1</sup>, Rafael Escudeiro<sup>1</sup>, Juan Antonio Alcántara-Núñez<sup>1</sup>, Jessica Fleury Curado<sup>3</sup>, Valdir Brunetti Scarduelli<sup>1</sup>, Vinicius Antonio Bocaline Zagatto<sup>1,4</sup>, Cléber Lima Rodrigues<sup>1</sup>, Manfredo Harri Tabacniks<sup>1</sup>

<sup>1</sup> Institute of Physics, University of São Paulo, São Paulo, São Paulo, 05508-090, Brazil.

<sup>2</sup> Federal Institute of Education, Science, and Technology of São Paulo - IFSP, 07115-000 Guarulhos, São Paulo, Brazil.

<sup>3</sup> Physics Dept., Centro Universitário-FEI, São Bernardo do Campo, São Paulo, Brazil.

<sup>4</sup> Physics Institute, Fluminense Federal University - UFF, Niterói, Rio de Janeiro, 24210-340, Brazil.

This supporting information provides the figures and tables to support the results presented in the main text.

## Table of Contents

Figure S1  
Tables S1–S2.

---

\* Corresponding author: [allegro@if.usp.br](mailto:allegro@if.usp.br)



Table S.2: Gamma-ray energies (in keV) used from  $^{63,65}\text{Cu}$  and  $^{60,62}\text{Ni}$  to obtain the  $^{63,65}\text{Cu}$  reaction cross-sections with  $^{\text{nat}}\text{Cu}$  and  $^{65}\text{Cu}$  targets and to determine the  $^{63,65}\text{Cu}$  isotopic ratio in the  $^{\text{mixed}}\text{Cu}$  target. The “Coincidence Spectrum” column indicates the coincidence spectrum from which the gamma-ray was observed, while the “ $E_{\text{yref}}$ ” column indicates the reference energy values, taken from references <sup>2-5</sup>. The errors are the standard counting statistics uncertainties and correspond to one sigma ( $k = 1$ ).

| Nucleus          | Coincidence Spectrum | $E_{\text{yref}}$ (keV)   |
|------------------|----------------------|---------------------------|
| $^{63}\text{Cu}$ | $\gamma$ -proton     | 449.93 (5)                |
|                  |                      | 584.82 (15)               |
|                  |                      | 645.4 (3)                 |
|                  |                      | 669.62(5) + 668.5 (2)     |
|                  |                      | 742.25 (10)               |
|                  |                      | 765.7 (5)                 |
|                  |                      | 881.0 (1)                 |
|                  |                      | 899.0 (4)                 |
|                  |                      | 955.0 (17) + 956.1 (5)    |
|                  |                      | 1048.8 (5)                |
|                  |                      | 1130.7 (3) + 1131.0 (1)   |
|                  |                      | 1178.9 (3)                |
|                  |                      | 1245.2 (2)                |
|                  |                      | 1327.03 (8)               |
|                  |                      | 1350.1 (4)                |
|                  |                      | 1412.08 (5)               |
|                  |                      | 1543.0 (1)                |
|                  |                      | 1547.04 (6)               |
|                  |                      | 1861.3 (3)                |
|                  |                      | 2011.4 (5) + 2012.0 (1)   |
| 2092.6 (5)       |                      |                           |
| 2336.5 (3)       |                      |                           |
| $^{65}\text{Cu}$ | $\gamma$ -proton     | 255.0 (13)                |
|                  |                      | 312.4 (6)                 |
|                  |                      | 439.7 (7)                 |
|                  |                      | 499.7 (21)                |
|                  |                      | 609.5 (1)                 |
|                  |                      | 612.7 (8)                 |
|                  |                      | 770.6 (2)                 |
|                  |                      | 1052.0 (4)                |
|                  |                      | 1115.546 (4)              |
|                  |                      | 1162.6 (11) + 1163.7 (11) |
|                  |                      | 1724.92 (6)               |
|                  |                      | 2094.3 (2)                |
| $^{60}\text{Ni}$ | $\gamma$ -alpha      | 467.3 (2)                 |
|                  |                      | 826.06 (3)                |
|                  |                      | 1332.501 (5)              |
| $^{62}\text{Ni}$ | $\gamma$ -alpha      | 1128.82 14                |
|                  |                      | 1163.50 (12)              |

## References

- <sup>1</sup> O. Tarasov and D. Bazin, Development of the program LISE: application to fusion–evaporation, *Nucl. Instrum. Methods Phys. Res. B*, 2003, **204**, 174 – 178.
- <sup>2</sup> A. L. Nichols, B. Singh, and J. K. Tuli, Nuclear Data Sheets for  $A = 62$ , *Nucl. Data Sheets*, 2012, **113**, 973 – 1114.
- <sup>3</sup> E. Browne and J. Tuli, Nuclear Data Sheets for  $A = 60$ , *Nucl. Data Sheets*, 2013, **114**, 1849–2022.
- <sup>4</sup> B. Erjun and H. Junde, Nuclear Data Sheets for  $A = 63$ , *Nucl. Data Sheets*, 2001, **92**, 147– 252.
- <sup>5</sup> E. Browne and J. Tuli, Nuclear Data Sheets for  $A = 65$ , *Nucl. Data Sheets*, 2010, **111**, 2425–2553.
